# Supplementary material for: Rifaximin as a Potential Treatment for IgA Nephropathy in a Humanized Mice Model
Source: MDPI journal article supplement (doi:10.3390/jpm11040309), 2021-04-16
Supplement: s1 [file s1]

## Supplementary data 1

**Table 1**

| Gene               | Accession number | 5'-3' sequence                   | Origin  |
|--------------------|------------------|----------------------------------|---------|
| $\beta$ -actin (F) | (NM_007393)      | 5'AGAGGGAAATCGTGCGTGAC -3'       | Eurofin |
| $\beta$ -actin (R) | (NM_007393)      | 5'CAATAGTGATGACCTGGCCGT-3'       | Eurofin |
| $\beta$ -actin (P) | (NM_007393)      | 5'CACTGCCGCATCCTCTTCCTCCC-3'     | Eurofin |
| TNF- $\alpha$ (F)  | (NM_013693)      | 5'CATCTTCTCAAAATTTCGAGTGACAA-3'  | Eurofin |
| TNF- $\alpha$ (R)  | (NM_013693)      | 5'TGGGAGTAGACAAGGTACAACCC-3'     | Eurofin |
| TNF- $\alpha$ (P)  | (NM_013693)      | 5'CACGTCGTAGCAAACCACCAAGTGGA-3'  | Eurofin |
| pIgR               | (NC_000067.6)    | Pre-design primer qMmuCIP0028503 | Bio-Rad |
| BAFF               | (NC_000074.6)    | Pre-design primer qMmuCIP0032122 | Bio-Rad |

F: Forward; R: Reverse; P: Probe (FAM)

## Supplementary data 2

### Proposal mechanism

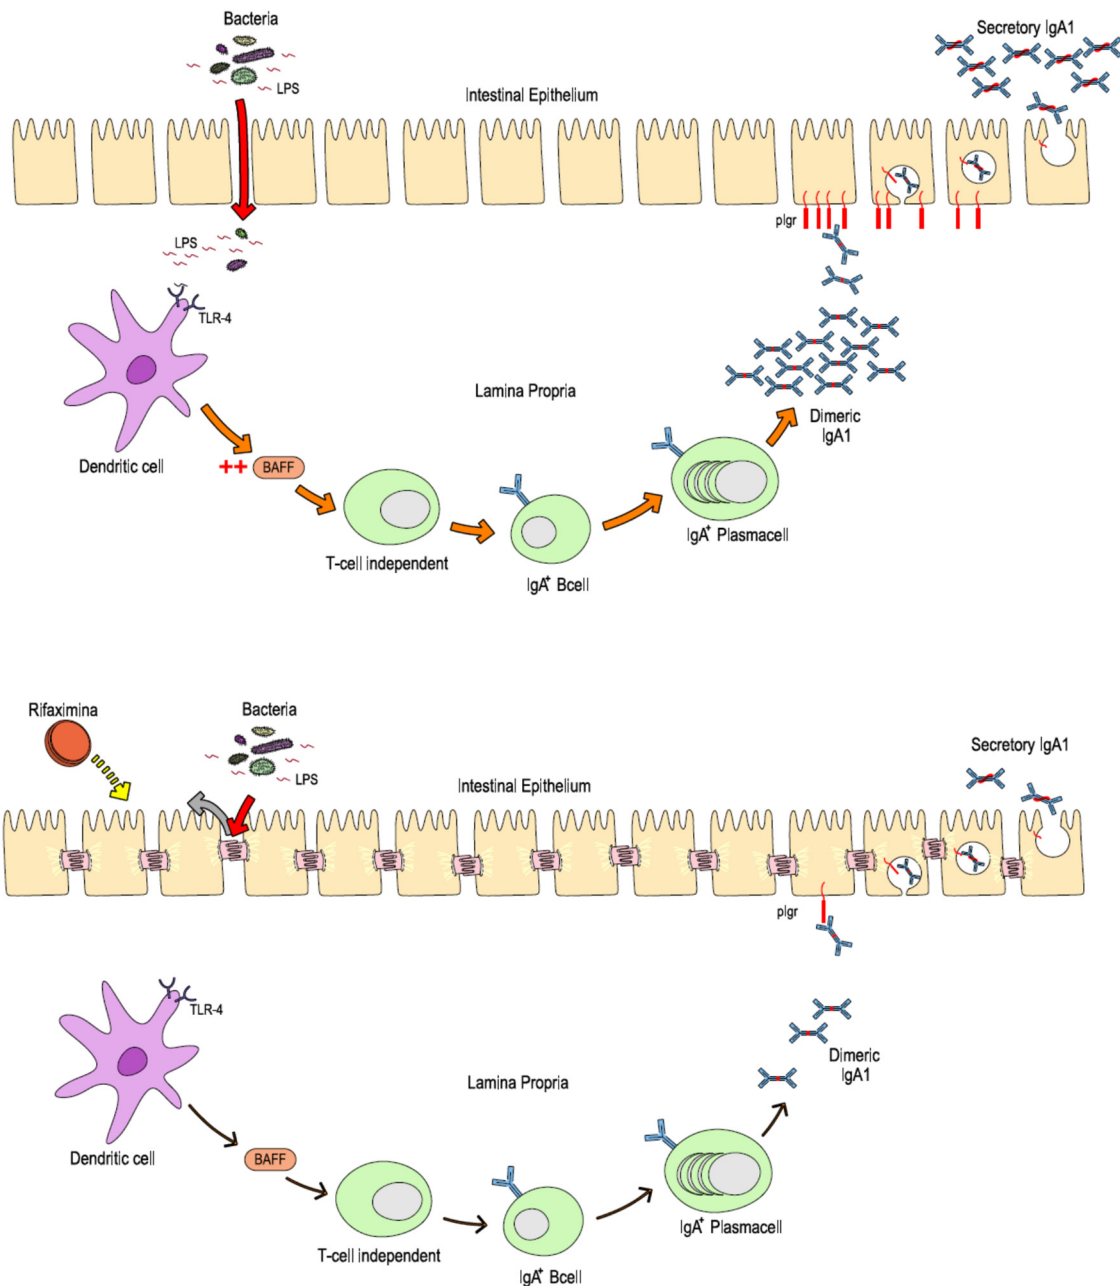

**Proposal mechanism:** rifaximin inhibits microbes-induced immune response, acts on intestinal barrier integrity and has an anti-inflammatory property through the binding to Pregnane X Receptor (PXR) and modulating gut microbiota [11, 24-26]. Its binding to PXR, is able to restore intestinal barrier function and to drop the TLR-4/NF- $\kappa$ B signaling pathway activation in the small intestine, leading to an inhibition of TNF- $\alpha$  synthesis. The reduction of the latter causes the upregulation of tight junction expression and the down synthesis of plgR, BAFF and, consequently, of Gd-IgA1.
